# Supplementary material for: Structural Transformation of the Tandem Ubiquitin-Interacting Motifs in Ataxin-3 and Their Cooperative Interactions with Ubiquitin Chains
Source: PubMed Central journal article supplement (PMC2951365; doi:10.1371/journal.pone.0013202), 2010-10-07
Supplement: pone.0013202.s002.pdf [file pone.0013202.s002.pdf]

**Table S2 Summary of the ITC data for AT3-UIM12 binding with diUb chains by different fitting models**

| Binding Pair      | $K_{d(1)}; K_{d(2)}$ ( $M^{-1}$ )          | Chi <sup>2</sup> /DOF | Fitting model           | Evaluation     |
|-------------------|--------------------------------------------|-----------------------|-------------------------|----------------|
| UIM12/Linear diUb | $5.95 \times 10^{-5}; 2.47 \times 10^{-3}$ | $4.1 \times 10^2$     | Sequential <sup>a</sup> | + <sup>b</sup> |
| UIM12/K48-diUb    | $1.43 \times 10^{-5}; 2.92 \times 10^{-4}$ | $6.5 \times 10^3$     | Sequential              | +              |
| UIM12/K63-diUb    | $1.02 \times 10^{-5}; 1.47 \times 10^{-4}$ | $1.1 \times 10^4$     | Sequential              | -              |
| GS-Sub/K48-diUb   | $1.81 \times 10^{-4}; 7.69 \times 10^{-7}$ | $9.4 \times 10^3$     | Conventional            | +/-            |
| GS-Ins/K48-diUb   | $4.85 \times 10^{-6}; 1.10 \times 10^{-4}$ | $1.4 \times 10^3$     | Conventional            | +              |
| RAP80L/K48-diUb   | $9.43 \times 10^{-7}; 2.79 \times 10^{-4}$ | $1.0 \times 10^3$     | Conventional            | +              |

<sup>a</sup> Conventional, conventional two-site binding model; Sequential, sequential two-site binding model.

<sup>b</sup> +, good fitting; +/-, moderate; -, bad fitting.
