# Supplementary material for: Structural Transformation of the Tandem Ubiquitin-Interacting Motifs in Ataxin-3 and Their Cooperative Interactions with Ubiquitin Chains
Source: PubMed Central journal article supplement (PMC2951365; doi:10.1371/journal.pone.0013202), 2010-10-07
Supplement: pone.0013202.s003.pdf [file pone.0013202.s003.pdf]

**Figure S1**

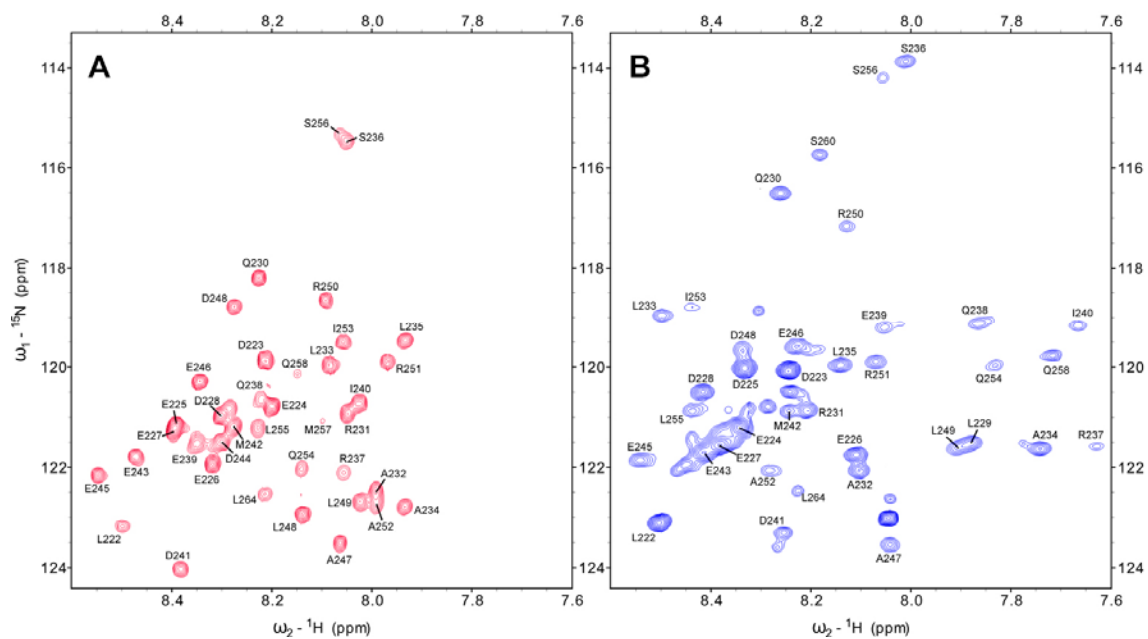

**Figure S1.  $^1\text{H}$ - $^{15}\text{N}$  HSQC Spectra Showing Assignments of Chemical Shifts of the AT3-UIM12 Forms.** (A) Free AT3-UIM12 form. The residues are numerated according to the sequence of AT3. (B) Ub-bound AT3-UIM12. The spectrum of Ub-bound form was recorded at the AT3-UIM12/Ub ratio of 1:4.
