# Supplementary material for: Structural Transformation of the Tandem Ubiquitin-Interacting Motifs in Ataxin-3 and Their Cooperative Interactions with Ubiquitin Chains
Source: PubMed Central journal article supplement (PMC2951365; doi:10.1371/journal.pone.0013202), 2010-10-07
Supplement: pone.0013202.s004.pdf [file pone.0013202.s004.pdf]

**Figure S2**

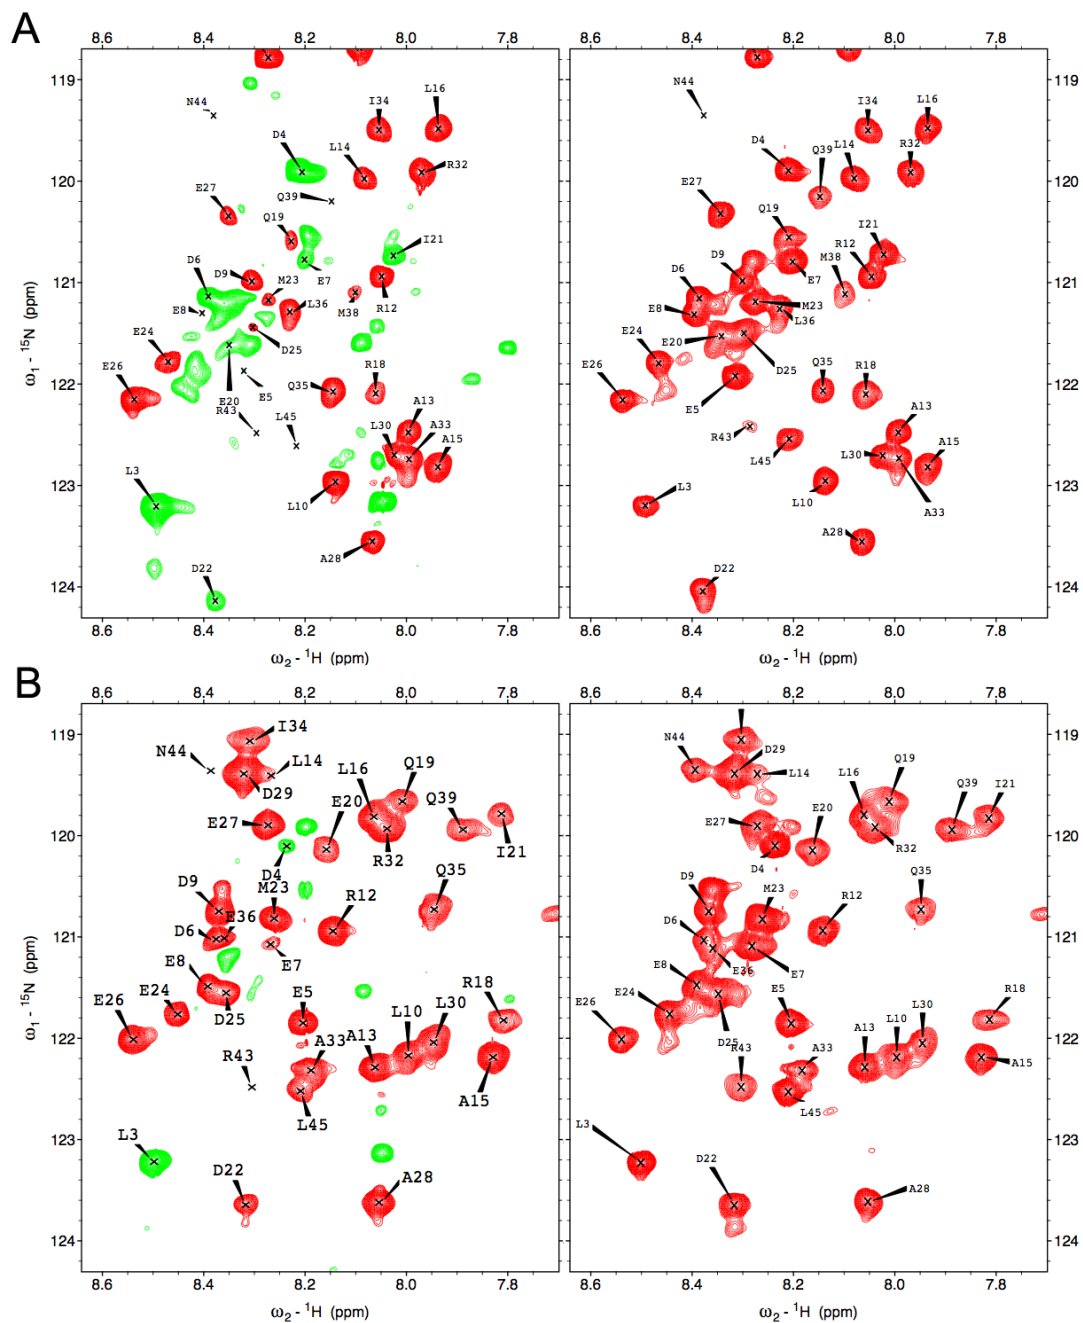

**Figure S2. Steady-state hetero-nuclear  $^{15}\text{N}\{-^1\text{H}\}$ -NOE experiments of AT3-UIM12 in the absence (A) and presence (B) of Ub.** The spectra on the left were recorded with proton saturation, while those on the right were recorded without proton saturation. The ratios of the peak intensities represents the hetero-nuclear  $^{15}\text{N}\{-^1\text{H}\}$ -NOE values for the backbone amides. Red, positive NOE; green, negative NOE.
