# Supplementary material for: Structural Transformation of the Tandem Ubiquitin-Interacting Motifs in Ataxin-3 and Their Cooperative Interactions with Ubiquitin Chains
Source: PubMed Central journal article supplement (PMC2951365; doi:10.1371/journal.pone.0013202), 2010-10-07
Supplement: pone.0013202.s005.pdf [file pone.0013202.s005.pdf]

**Figure S3**

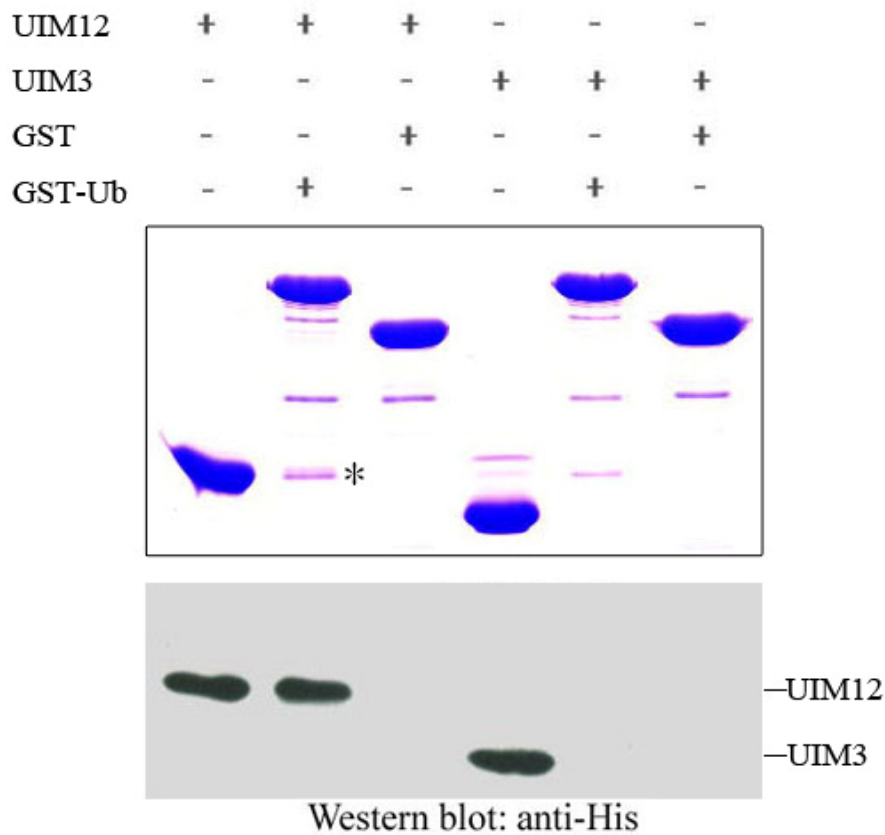

**Figure S3. Pull-down Experiment Showing Bindings of AT3-UIM12 and AT3-UIM3 with Ub.** The GST pull-down experiments were carried out between GST-Ub and AT3-UIMs, and detected by Coomassie staining and Western blotting with anti-His antibody. AT3-UIM12 pulled down by GST-Ub is indicated by an asterisk. AT3-UIM12 refers to the tandem UIMs of AT3 (residues 222 – 263); and AT3-UIM3 denotes the third UIM motif (residues 335 – 354).
