# Supplementary material for: Structural Transformation of the Tandem Ubiquitin-Interacting Motifs in Ataxin-3 and Their Cooperative Interactions with Ubiquitin Chains
Source: PLOS journal article supplement (doi:10.1371/journal.pone.0013202), 2010-10-07
Supplement: S6 (10.1371/journal.pone.0013202.s006) [file journal.pone.0013202.s006]

**Figure S4**

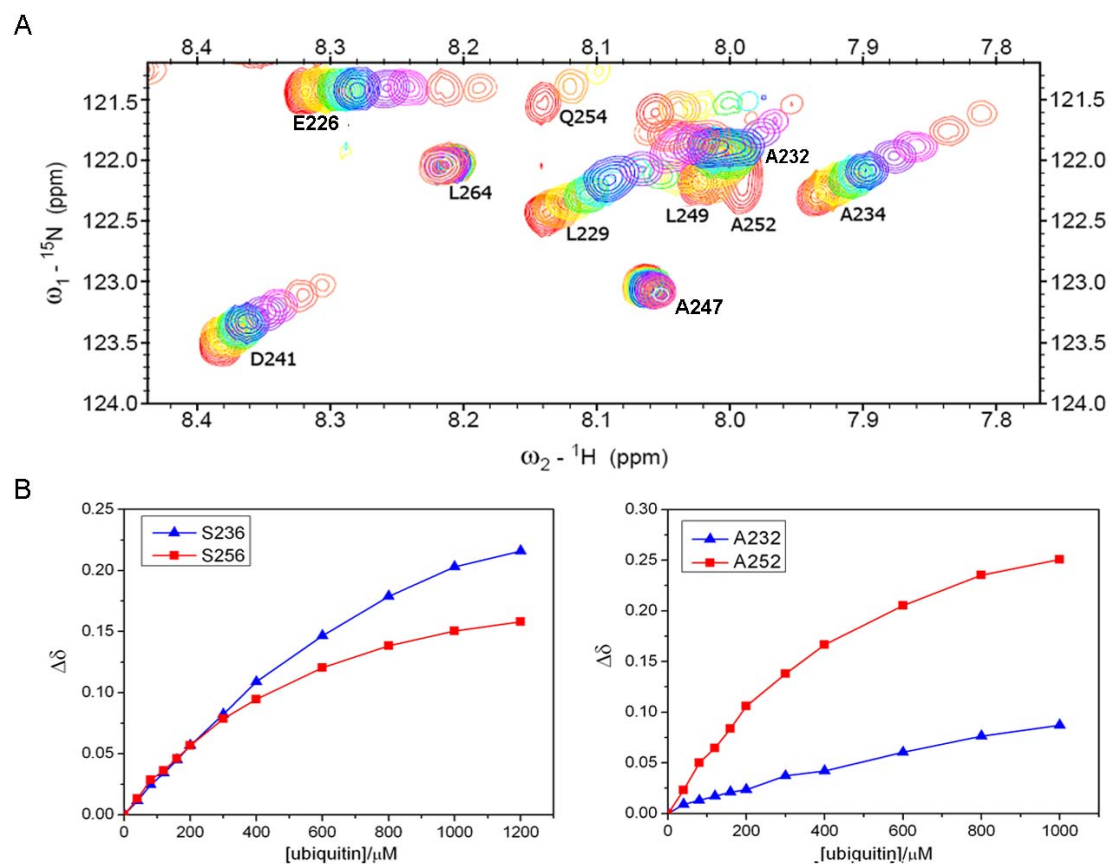

**Figure S4. NMR Titration Showing the Interaction of Tandem AT3-UIM12 with Ub.** (A) Traces for the chemical shift changes of the representative residues of AT3-UIM12 upon Ub titration. The peaks are colored from red (UIM/Ub = 1:0) to coral (1:6). (B) Titration curves for two equivalent residues, Ser236 in UIM1 and Ser256 in UIM2 (left panel), and Ala232 and Ala252 (right), in tandem AT3-UIM12 upon increasing amount of Ub. Note that the  $\Delta\delta$  values of the residues in UIM2 moiety upon Ub titration reach the plateau with lower amount of Ub than the corresponding ones in UIM1.
